# Supplementary material
Source: publisher site journal article supplement (https://www.e-cmh.org/upload/media/cmh-2022-0322-Supplementary-Fig-1.pdf)
Supplement: Supplementary file 1 [file cmh-2022-0322-Supplementary-Fig-1.pdf]

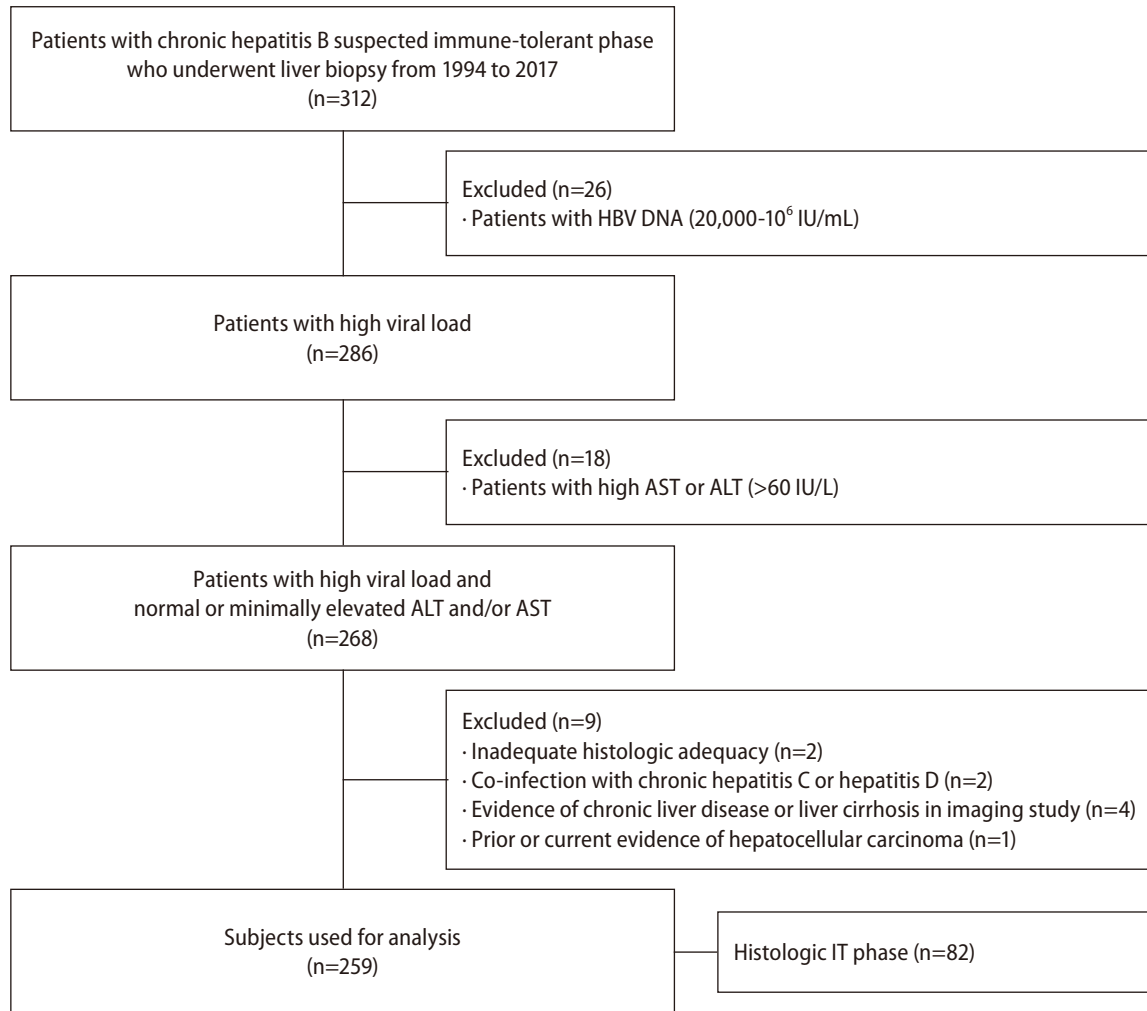

**Supplementary Figure 1.** Flow chart of the patients. HBV, hepatitis B virus; ALT, alanine aminotransferase; AST, aspartate aminotransferase; IT, immune-tolerant.
